# Supplementary material for: Graphene oxide reinforced silk fibroin nanocomposite as an electroactive interface for the estimation of dopamine
Source: Royal Society of Chemistry journal article supplement (doi:10.1039/d2ra05585f), 2022-01-01
Supplement: d2ra05585f1.pdf [file d2ra05585f1.pdf]

## Supplementary Information to Graphene Oxide Reinforced Silk Fibroin Nanocomposite as an Electroactive Interface for Estimation of Dopamine

Afifa Noor,<sup>a,b</sup> Hamad Khalid,<sup>\*a</sup> Muhammad Aslam,<sup>b</sup> Akhtar Hayat,<sup>a</sup> Ather Farooq Khan,<sup>a</sup> Muhammad Nasir,<sup>a</sup> Aqif Anwar Chaudhry,<sup>a</sup> Mian Hasnain Nawaz<sup>\*a</sup>

<sup>a</sup> Interdisciplinary Research Centre in Biomedical materials (IRCBM), COMSATS University Islamabad, Lahore Campus, 54000, Pakistan

<sup>b</sup> Department of Chemistry, Division of Science and Technology, University of Education, Lahore, 54000, Pakistan

Contact: (HK) [hamadkhalid@cuilahore.edu.pk](mailto:hamadkhalid@cuilahore.edu.pk) ;(MHN) [mhnawaz@cuilahore.edu.pk](mailto:mhnawaz@cuilahore.edu.pk)

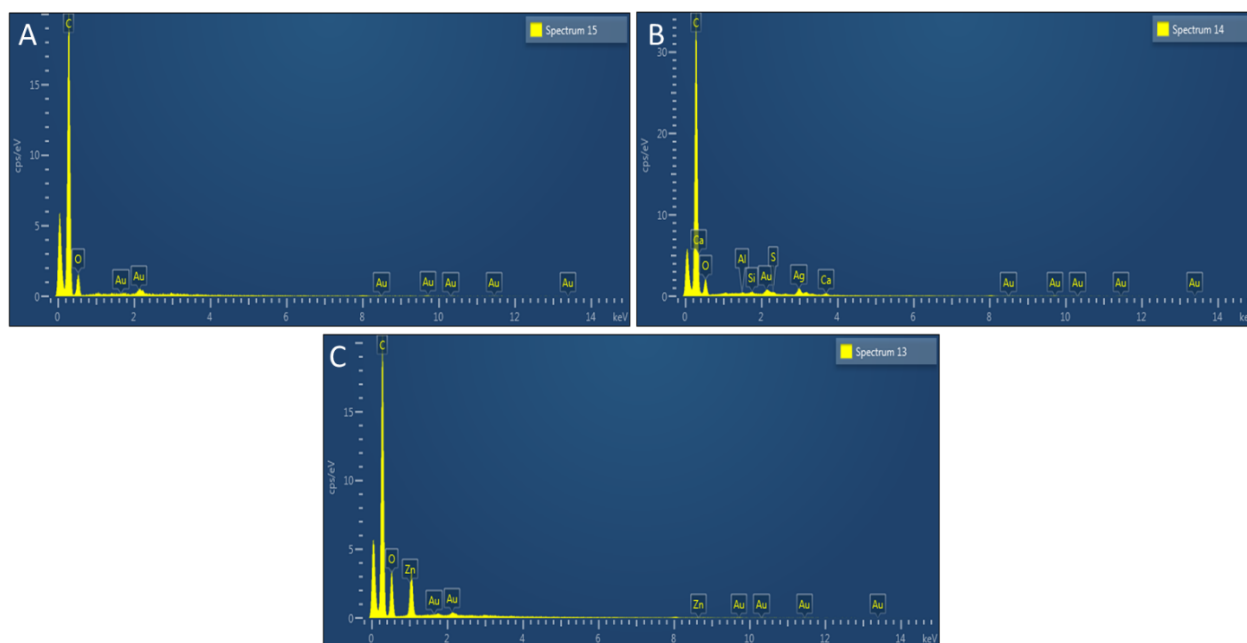

**Figure S1.** EDX spectra of (A) GO/CC, (B) SF/CC, and (C) C2/CC representing the elemental composition

### Results

|                               | Size (d.nm):         | % Intensity: | St Dev (d.n...) |
|-------------------------------|----------------------|--------------|-----------------|
| <b>Z-Average (d.nm): 1361</b> | <b>Peak 1:</b> 604.4 | 84.7         | 88.26           |
| <b>Pdl: 0.972</b>             | <b>Peak 2:</b> 8.169 | 9.5          | 1.063           |
| <b>Intercept: 1.02</b>        | <b>Peak 3:</b> 108.0 | 5.8          | 11.23           |

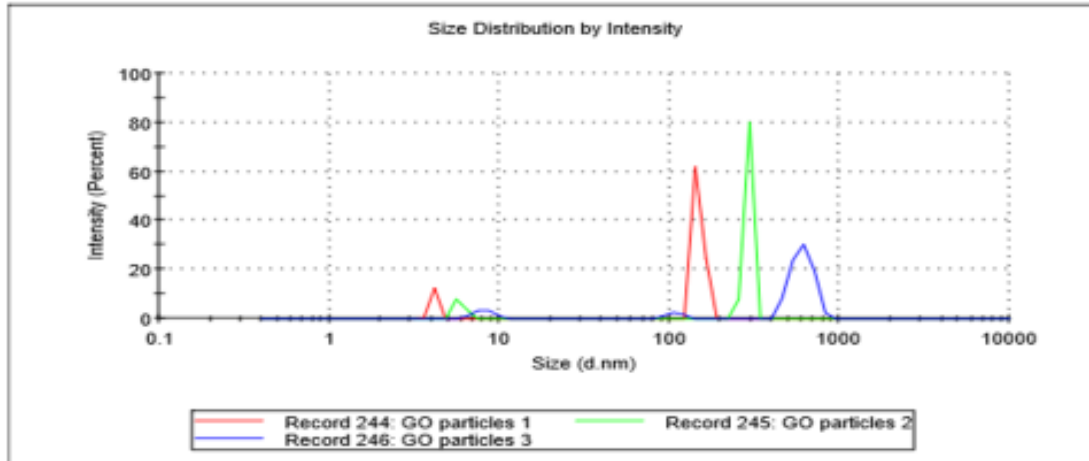

Figure S2. Particle size analysis of GO suspension by DLS

### Results

|                                     | Mean (mV)            | Area (%) | St Dev (mV) |
|-------------------------------------|----------------------|----------|-------------|
| <b>Zeta Potential (mV): -8.42</b>   | <b>Peak 1:</b> -8.42 | 100.0    | 4.42        |
| <b>Zeta Deviation (mV): 4.42</b>    | <b>Peak 2:</b> 0.00  | 0.0      | 0.00        |
| <b>Conductivity (mS/cm): 0.0657</b> | <b>Peak 3:</b> 0.00  | 0.0      | 0.00        |

Result quality : **Good**

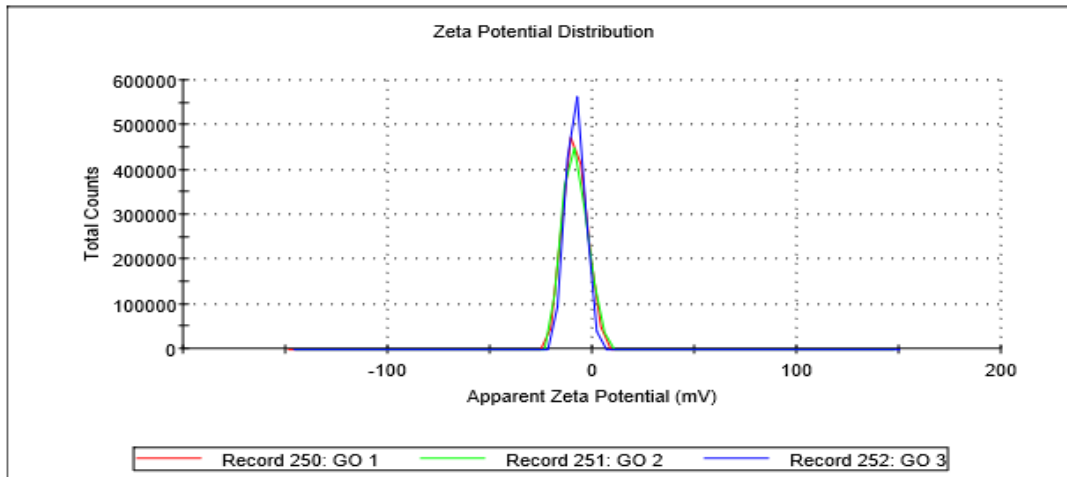

Figure S3. Zeta potential measurement of GO suspension by DLS

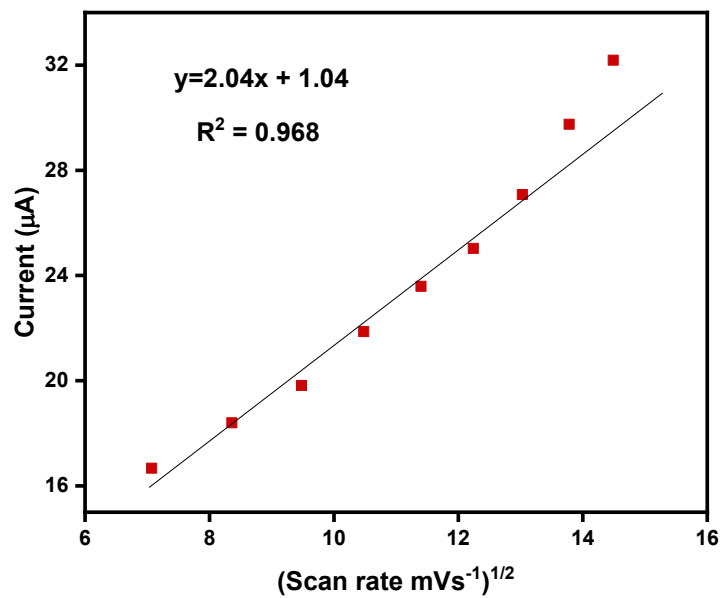

**Figure S4.** Linear relationship between square root of scan rate and anodic peak current
